# Supplementary material
Source: PubMed Central journal article supplement (PMC2039774)

A

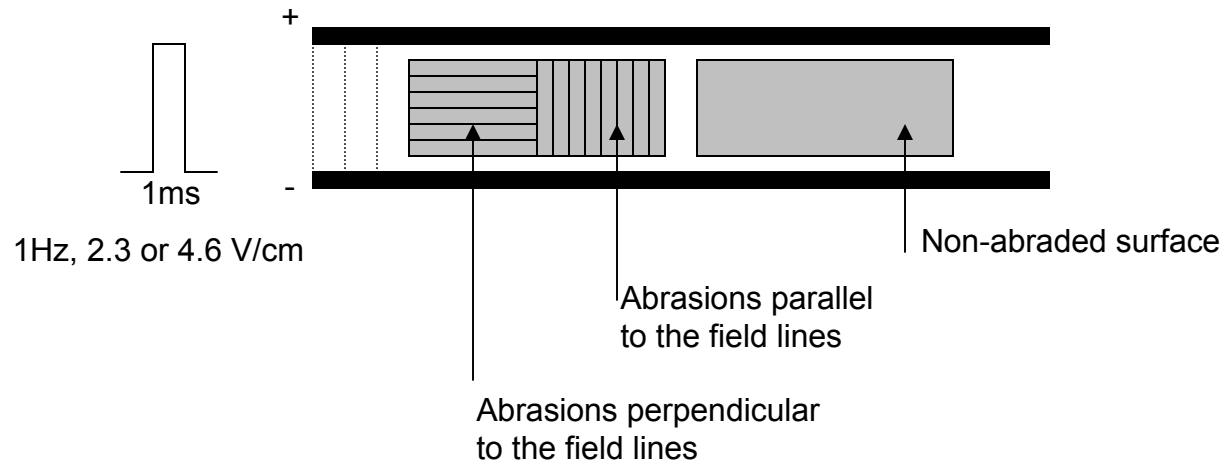

B

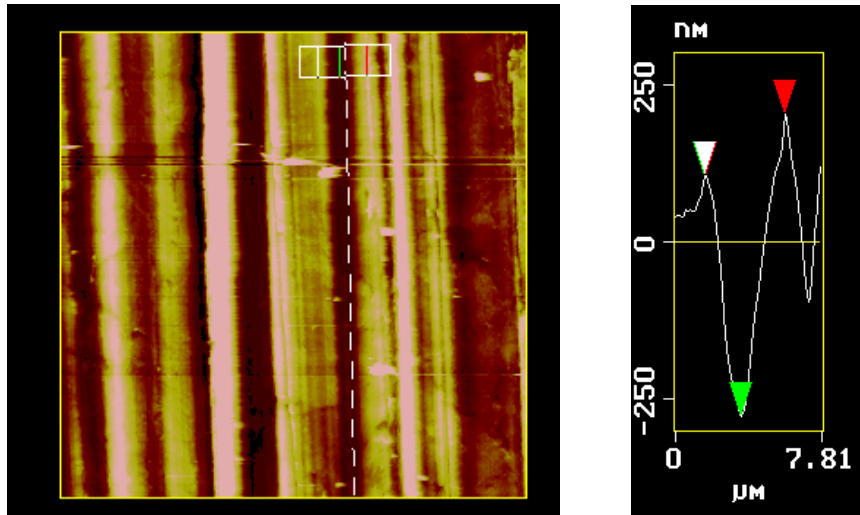

Supplement: NIHMS29729-supplement-01.pdf [file NIHMS29729-supplement-01.pdf]

**A**

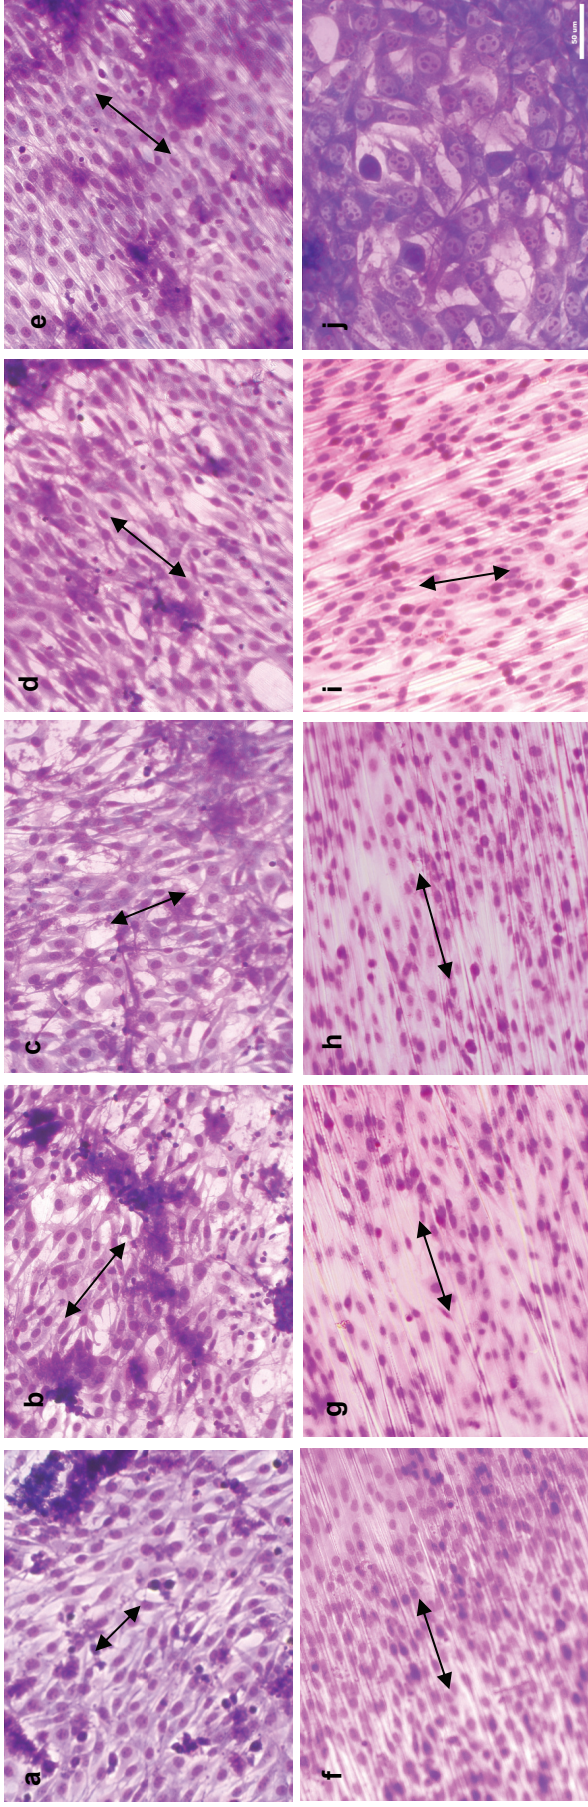

**B**

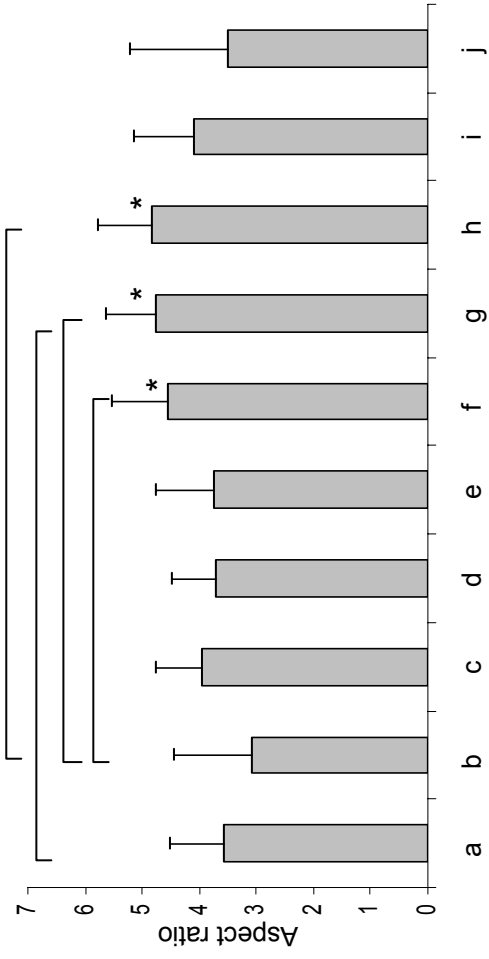

**C**

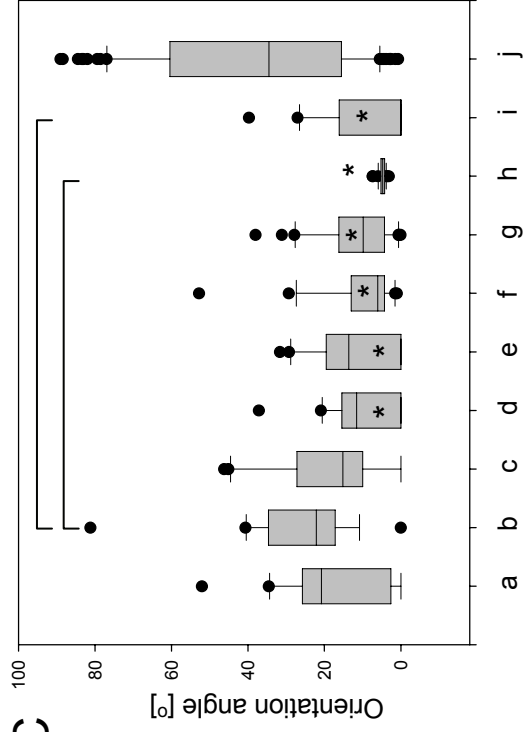

Supplement: NIHMS29729-supplement-02.pdf [file NIHMS29729-supplement-02.pdf]

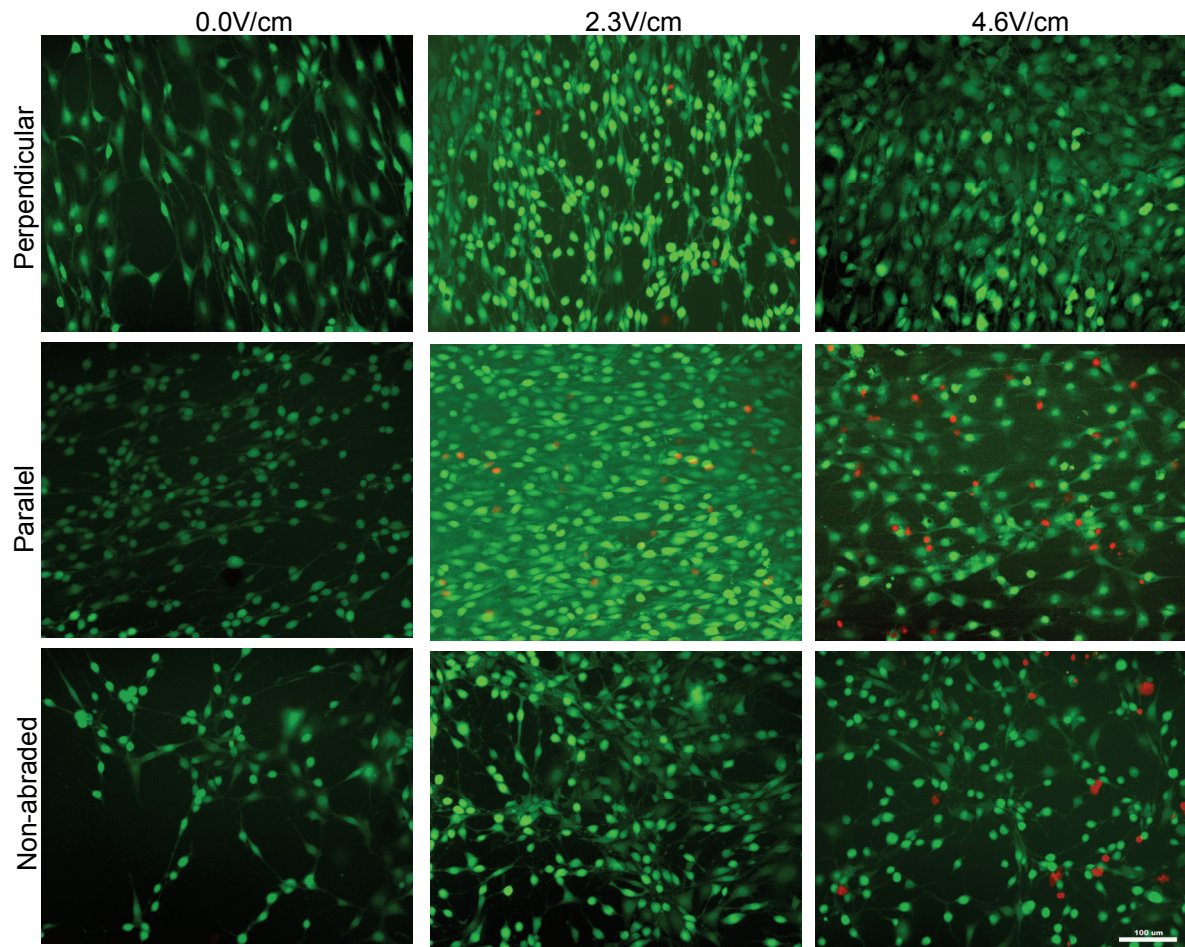

Supplementary Figure 3:

Supplement: NIHMS29729-supplement-03.pdf [file NIHMS29729-supplement-03.pdf]

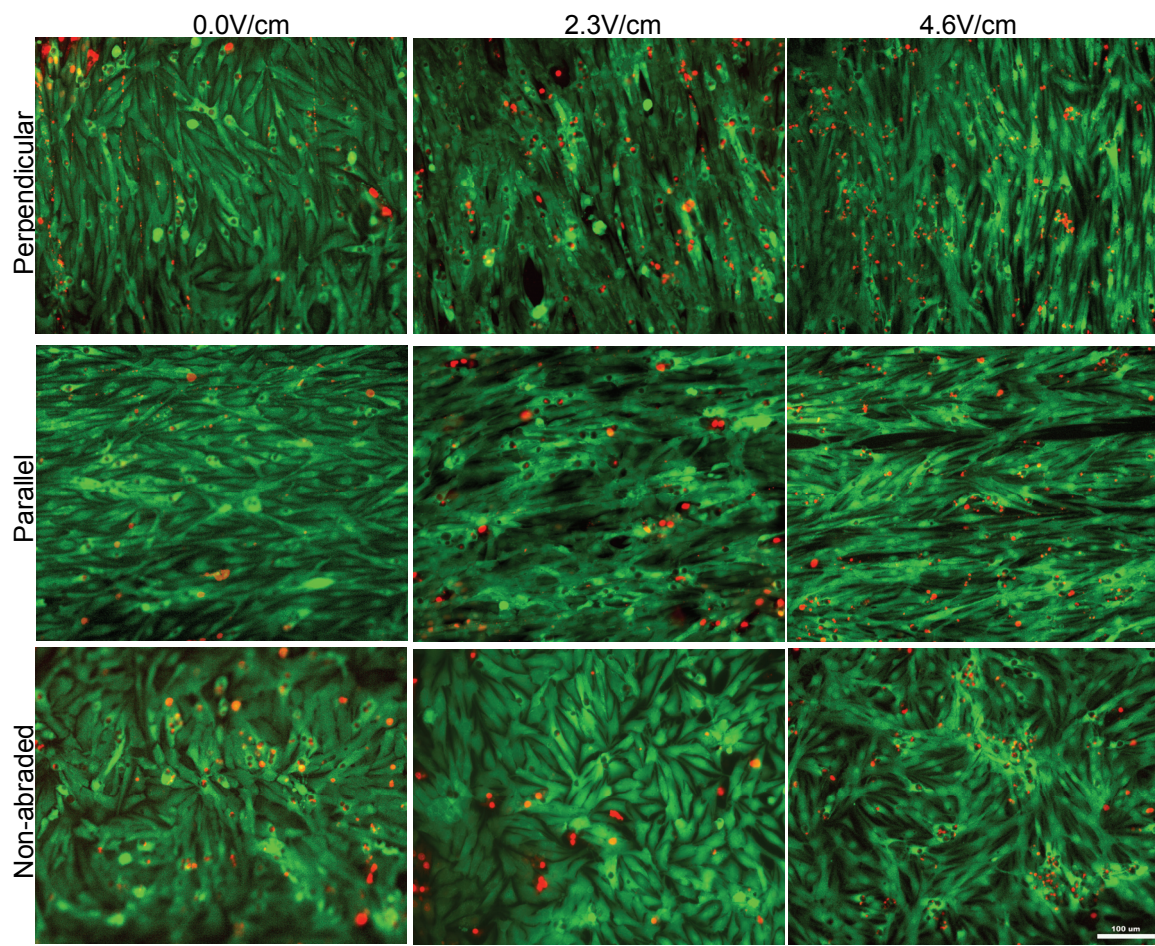

Supplementary Figure 4

Supplement: NIHMS29729-supplement-04.pdf [file NIHMS29729-supplement-04.pdf]

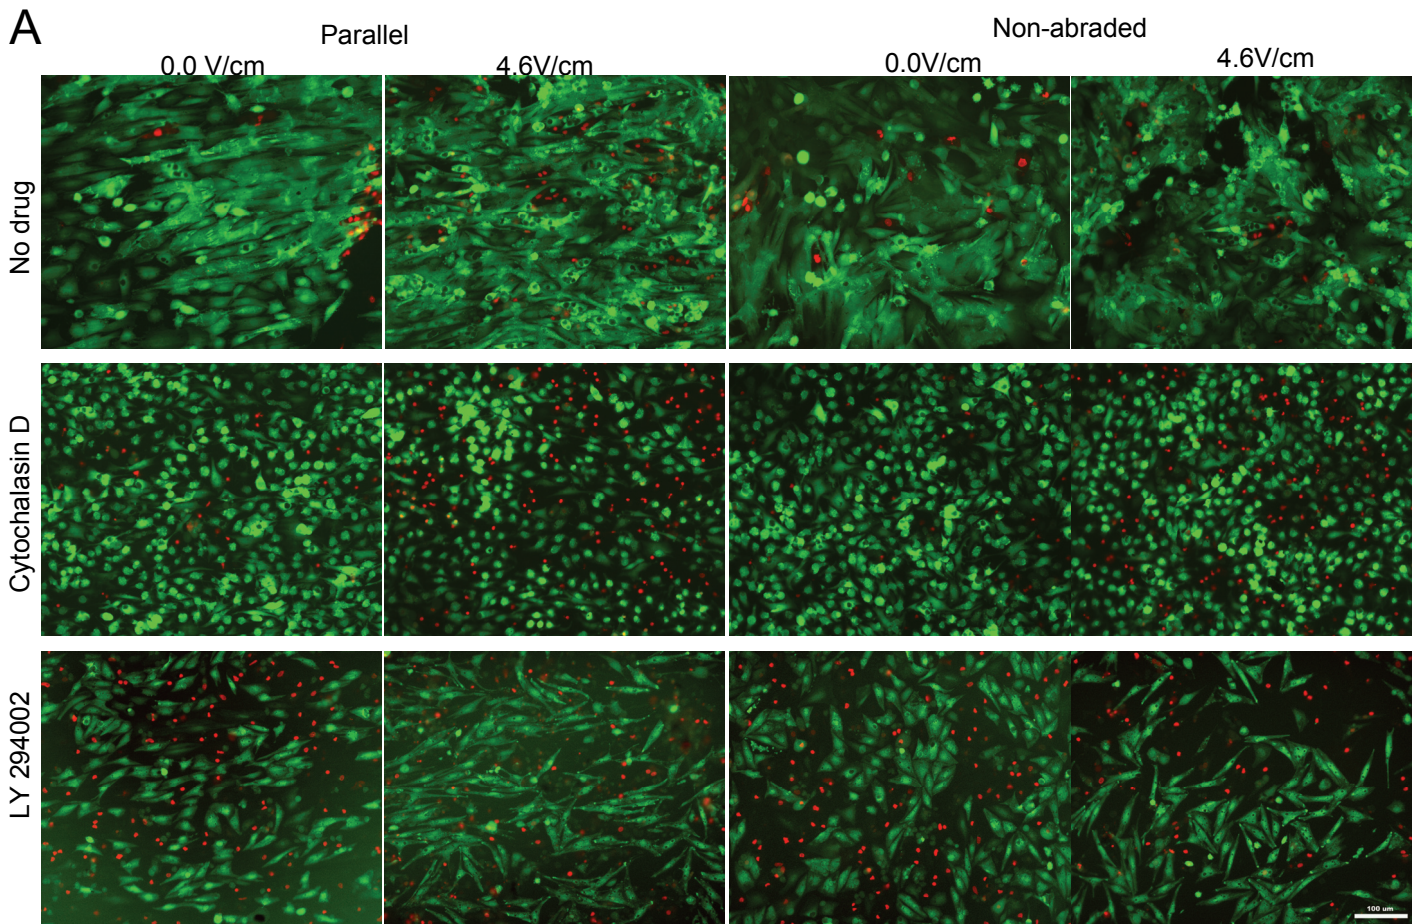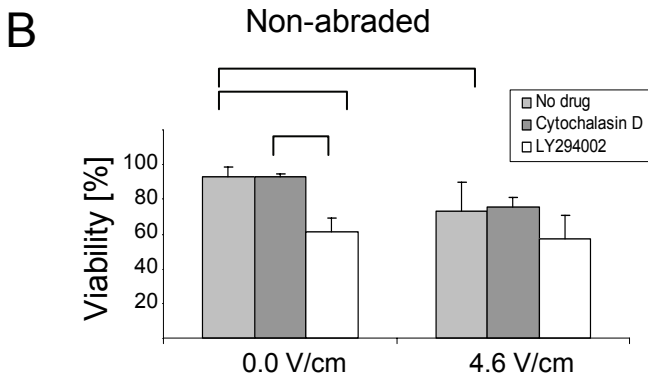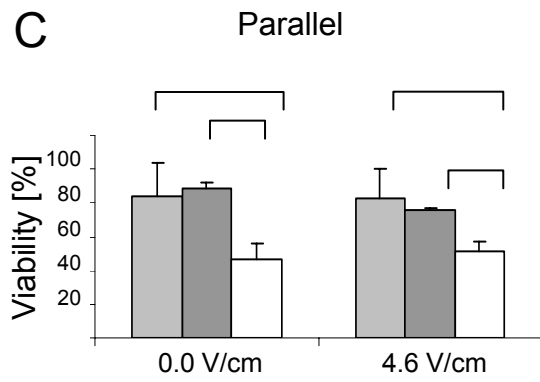

Supplementary Figure 5:

Supplement: NIHMS29729-supplement-05.pdf [file NIHMS29729-supplement-05.pdf]

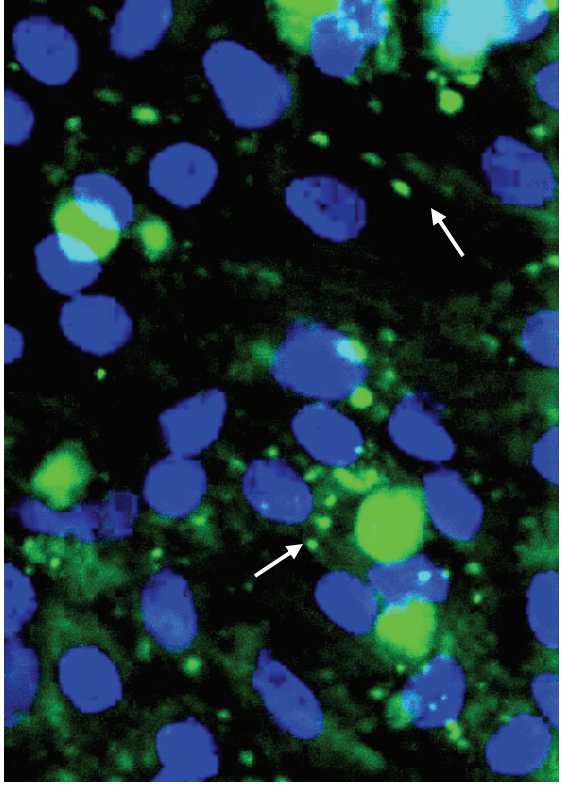

B

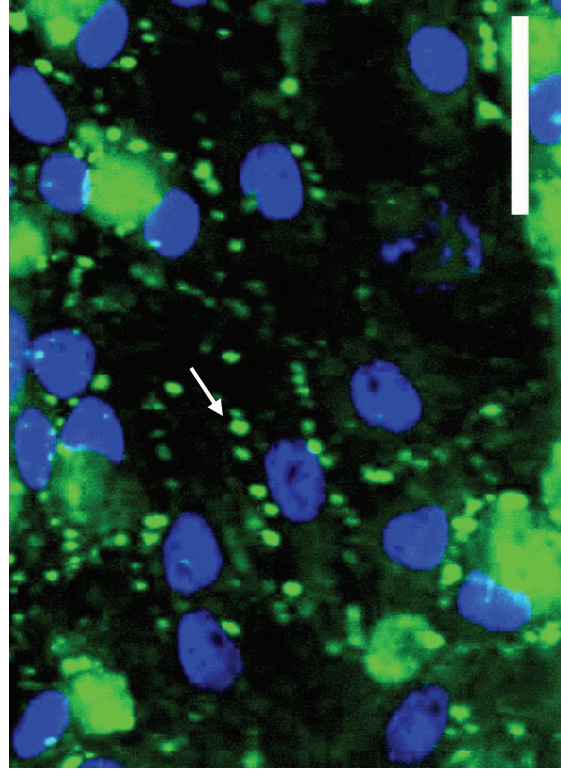

A

Supplement: NIHMS29729-supplement-06.pdf [file NIHMS29729-supplement-06.pdf]
